# Supplementary material for: Time to administer polymyxin B hemoperfusion and hemodynamics in patients with septic shock requiring high-dose norepinephrine: a predetermined analysis of a prospective cohort study
Source: Springer Nature journal article supplement (doi:10.1186/s13054-025-05422-7), 2025-05-09
Supplement: MOESM1 [file 13054_2025_5422_MOESM1_ESM.pdf]

# Additional files

- Supplementary Figure 1. Mean arterial pressure before and after starting polymyxin B hemoperfusion
- Supplementary Figure 2. Vasoactive-inotropic score before and after starting polymyxin B hemoperfusion
- Supplementary Figure 3. Ninety-day mortality after ICU admission in each tertile group
- Supplementary Figure 4. Receiver operating characteristic curve analysis of the time to PMX-HP initiation and 28-day mortality.

# Additional files

- Supplementary Table 1. Baseline demographics and clinical characteristics in patients treated with and without PMX-HP from entire cohort of BEAT-SHOCK registry .
- Supplementary Table 2. Hazard ratio of time from ICU admission to administration of PMX-HP for 90-day mortality adjusted by SOFA score on the day of PMX-HP initiation.
- Supplementary Table 3. Hazard ratio of time from ICU admission to administration of PMX-HP as a continuous variable for 90-day mortality.

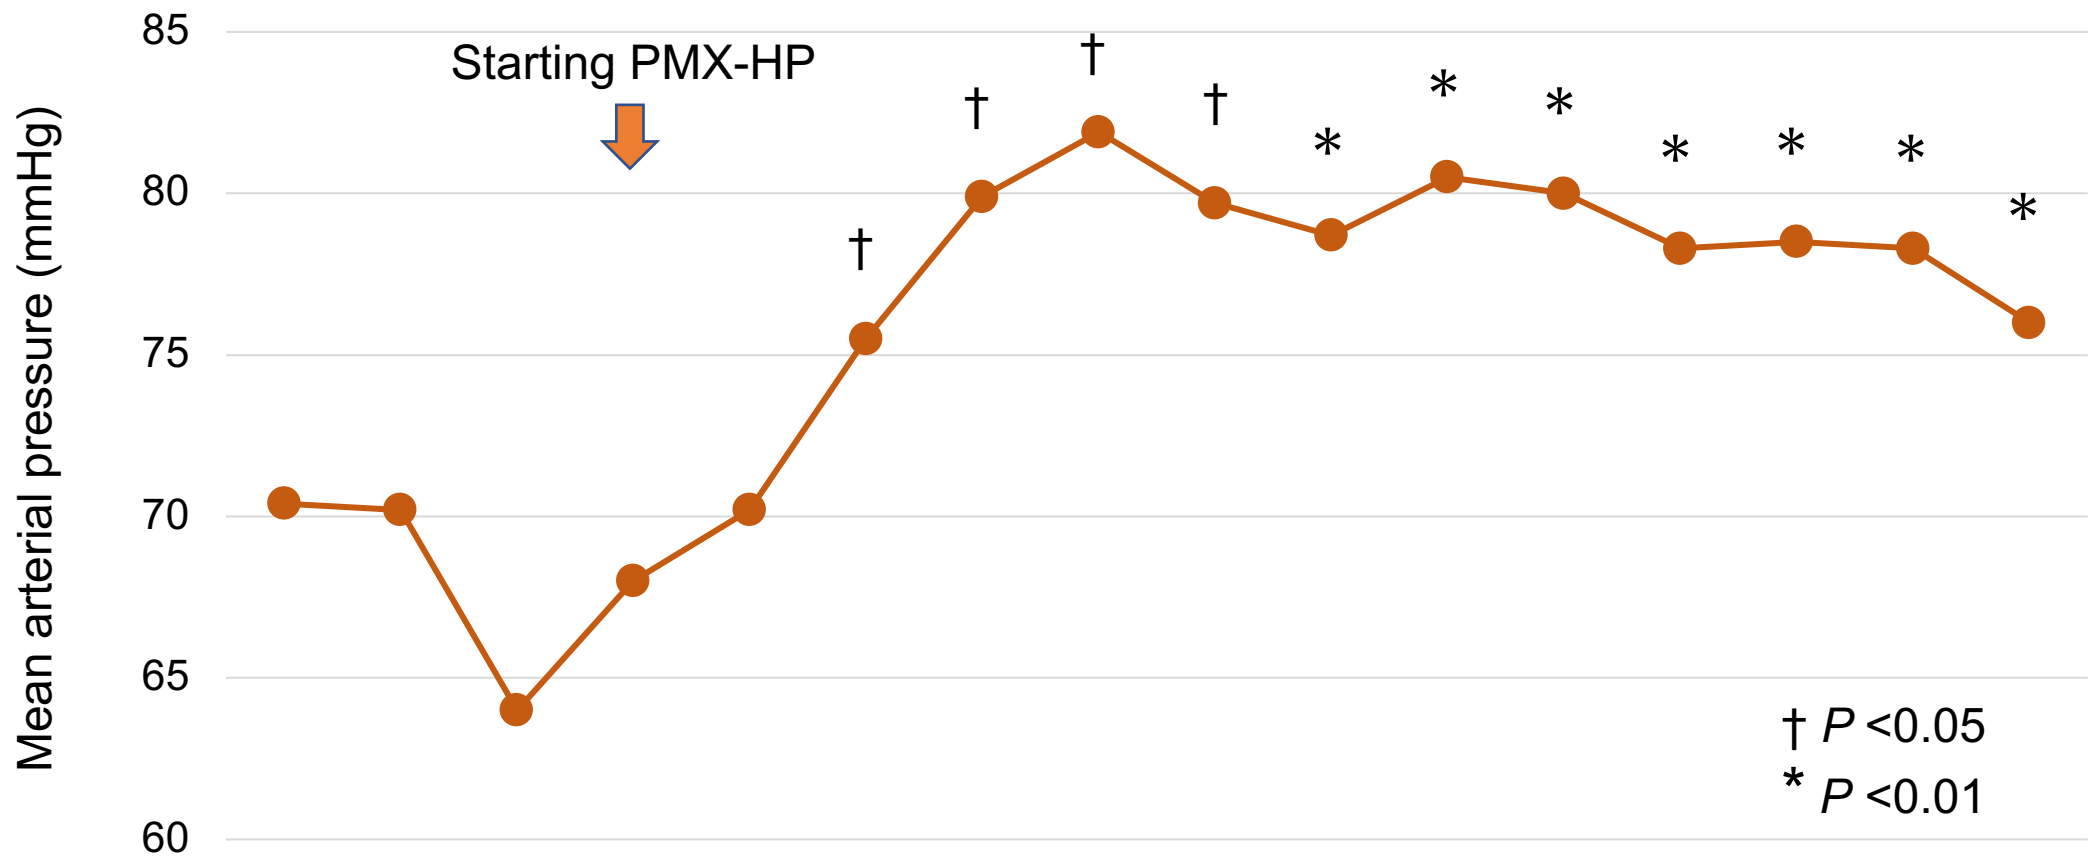

|                            |    |    |    |    |    |    |    |    |    |    |    |    |    |    |    |    |
|----------------------------|----|----|----|----|----|----|----|----|----|----|----|----|----|----|----|----|
| Hours from starting PMX-HP | -6 | -4 | -2 | 0  | 2  | 4  | 6  | 8  | 10 | 12 | 14 | 16 | 18 | 20 | 22 | 24 |
| Number of patients         | 30 | 48 | 61 | 81 | 82 | 82 | 82 | 82 | 81 | 79 | 80 | 80 | 79 | 80 | 77 | 78 |

Supplementary Figure 1. Mean arterial pressure before and after starting polymyxin B hemoperfusion

At four hours and thereafter from starting polymyxin B hemoperfusion, mean arterial pressure significantly elevated from 0 hour. We used signed Wilcoxon rank sum test for each comparison between mean arterial pressures at 0 hour and at each time point. Median values for mean arterial pressure are shown.

PMX-HP; polymyxin B hemoperfusion.

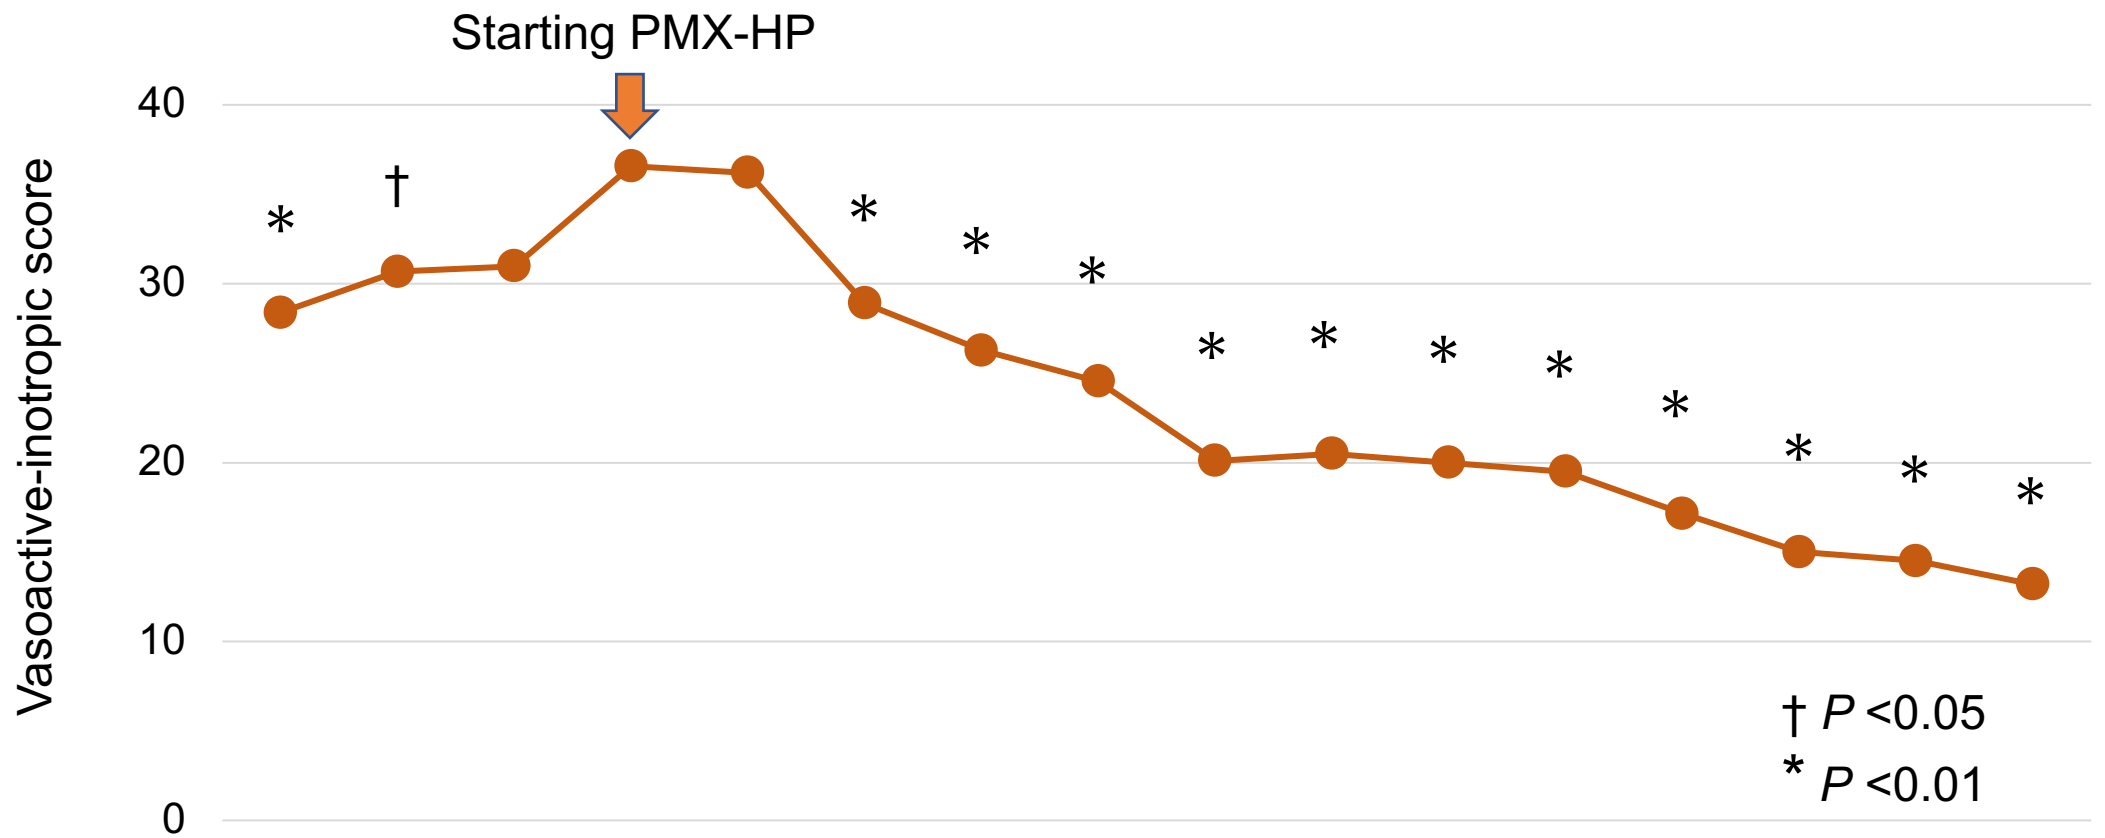

Supplementary Figure 2. Vasoactive-inotropic score before and after starting polymyxin B hemoperfusion

At four hours and thereafter from starting polymyxin B hemoperfusion, vasoactive-inotropic score (VIS) significantly decreased from 0 hour. We used signed Wilcoxon rank sum test for each comparison between VIS at 0 hour and at each time point. Median values for VIS are shown. VIS was calculated as: norepinephrine ( $\mu\text{g/kg/min}$ )  $\times$  100 + epinephrine ( $\mu\text{g/kg/min}$ )  $\times$  100 + dopamine ( $\mu\text{g/kg/min}$ ) + dobutamine ( $\mu\text{g/kg/min}$ ) + vasopressin (unit/kg/min)  $\times$  10,000 + levosimendan ( $\mu\text{g/kg/min}$ )  $\times$  50 + milrinone ( $\mu\text{g/kg/min}$ )  $\times$  10.

PMX-HP; polymyxin B hemoperfusion.

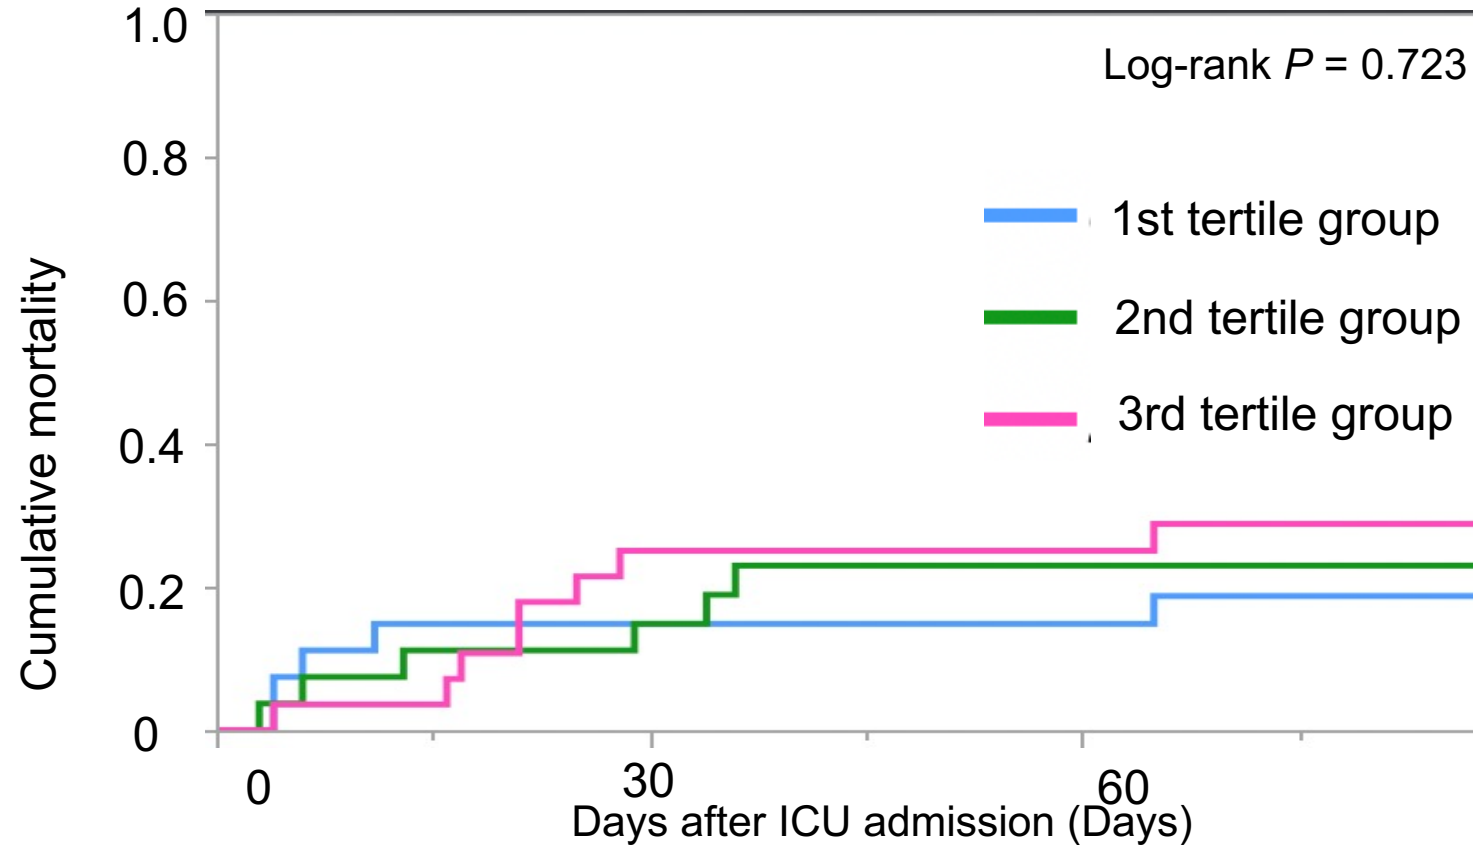

Supplementary Figure 3.

Ninety-day mortality after ICU admission in each tertile group.

We present time-to-event curve for death at 90-days after ICU admission. We divided into three tertile groups by time from ICU admission to administration of PMX-HP. Median time from ICU admission to PMX-HP were 65 (IQR 50–115), 265 (IQR 230–310), and 690 (IQR 463–955) minutes in the 1st, 2nd, and 3rd tertile groups, respectively.

ICU: intensive care unit; IQR: interquartile range; PMX-HP: polymyxin B hemoperfusion.

| Days        |                      | 0  | 30    | 60    | 90    |
|-------------|----------------------|----|-------|-------|-------|
| 1st tertile | Number at risk       | 27 | 24    | 23    | 20    |
|             | Cumulative events    |    | 4     | 4     | 5     |
|             | Cumulative incidence |    | 14.8% | 14.8% | 18.7% |
| 2nd tertile | Number at risk       | 27 | 22    | 20    | 19    |
|             | Cumulative events    |    | 4     | 6     | 6     |
|             | Cumulative incidence |    | 14.8% | 22.9% | 22.9% |
| 3rd tertile | Number at risk       | 28 | 20    | 20    | 17    |
|             | Cumulative events    |    | 7     | 7     | 8     |
|             | Cumulative incidence |    | 25.0% | 25.0% | 28.8% |

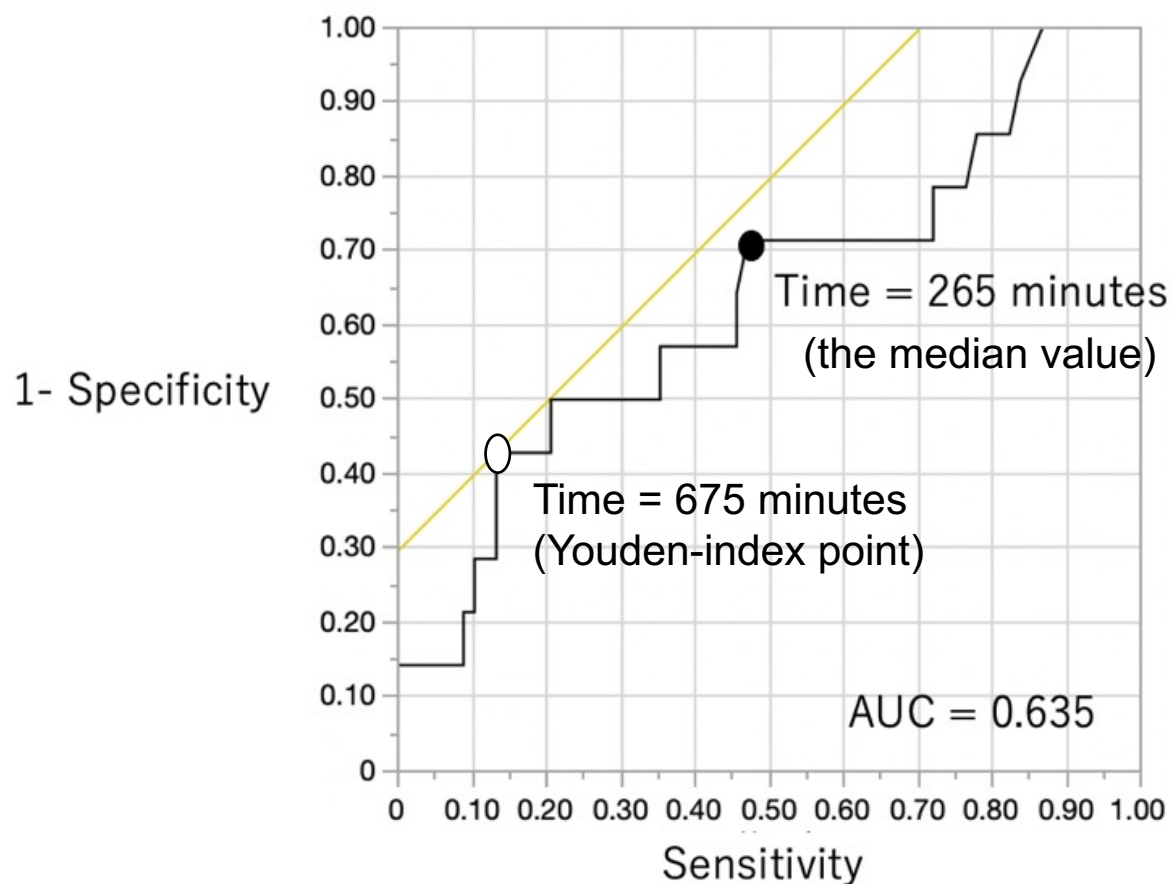

Supplementary Figure 4. Receiver operating characteristic curve analysis of the time to PMX-HP initiation and 28-day mortality.

The median time of 265 min (black dot) was close to the Youden-index metrics (diagonal line). Cox proportional hazard models using the Youden-index cutoff point (675 min) showed a crude hazard ratio of 0.35 (95%CI 0.12–1.06) and an adjusted hazard ratio of 0.20 (95%CI 0.05–0.79) for 28-day mortality, comparing early initiation with late initiation.

PMX-HP: polymyxin B hemoperfusion; CI: confidence interval; AUC: area under the curve.

Supplementary Table 1. Baseline demographics and clinical characteristics in patients treated with and without PMX-HP from entire cohort of BEAT-SHOCK registry

|                                                                                                   | Patients treated<br>with PMX-HP<br>(n = 82) | Patients treated<br>without PMX-HP<br>(n = 227) |
|---------------------------------------------------------------------------------------------------|---------------------------------------------|-------------------------------------------------|
| Age, y, median (IQR)                                                                              | 71 (62–80)                                  | 73 (65–81)                                      |
| Male, n (%)                                                                                       | 46 (56)                                     | 129 (57)                                        |
| Emergent surgery, n (%)                                                                           | 36 (44)                                     | 72 (32)                                         |
| SOFA score at ICU admission, median (IQR)                                                         | 11 (9–13)                                   | 11 (9–14)                                       |
| APACHE II score on ICU admission, median (IQR)                                                    | 26 (21–31)                                  | 27 (22–33)                                      |
| Comorbidity*                                                                                      |                                             |                                                 |
| Chronic hemodialysis, n (%)                                                                       | 4 (5)                                       | 15 (7)                                          |
| Immuno-compromised, n (%)                                                                         | 4 (5)                                       | 11 (5)                                          |
| Chronic respiratory disorder, n (%)                                                               | 3 (4)                                       | 3 (1)                                           |
| Liver cirrhosis, n (%)                                                                            | 0 (0)                                       | 5 (2)                                           |
| Chronic heart failure, n (%)                                                                      | 0 (0)                                       | 0 (0)                                           |
| Charlson comorbidity index, median (IQR)                                                          | 1 (0–3)                                     | 1 (0–3)                                         |
| Site of infection                                                                                 |                                             |                                                 |
| Abdomen, n (%)                                                                                    | 37 (45)                                     | 78 (34)                                         |
| Urinary tract, n (%)                                                                              | 18 (22)                                     | 32 (14)                                         |
| Thorax, n (%)                                                                                     | 8 (10)                                      | 51 (23)                                         |
| Skin and soft tissue, n (%)                                                                       | 14 (17)                                     | 42 (19)                                         |
| Others, n (%)                                                                                     | 5 (6)                                       | 24 (11)                                         |
| Isolated pathogen                                                                                 |                                             |                                                 |
| Gram-negative bacteria, n (%)                                                                     | 39 (48)                                     | 96 (42)                                         |
| Gram-positive bacteria, n (%)                                                                     | 10 (12)                                     | 40 (18)                                         |
| Others (including unknown), n (%)                                                                 | 33 (40)                                     | 91 (40)                                         |
| Lactate concentration on ICU admission, mmol/L, median (IQR)                                      | 4.2 (2.7–6.7)                               | 4.0 (2.6–6.5)                                   |
| Mean arterial pressure on ICU admission, mmHg, median (IQR)                                       | 71 (60–81)                                  | 68 (56–79)                                      |
| Heart rate on ICU admission, bpm, median (IQR)                                                    | 108 (90–127)                                | 110 (95–124)                                    |
| Maximum norepinephrine dosage within 6 h after ICU admission, $\mu\text{g/kg/min}$ , median (IQR) | 0.30 (0.24–0.43)                            | 0.28 (0.20–0.40)                                |

\* Comorbidity was defined in accordance with the APACHE II score definition.

PMX-HP: polymyxin B hemoperfusion; BEAT-SHOCK: BEst Available Treatment for septic SHOCK;

IQR: interquartile range; ICU: intensive care unit; SOFA: sequential organ failure assessment; APACHE

II: Acute Physiology and Chronic Health Evaluation II.

Supplementary Table 2. Hazard ratio of time from ICU admission to administration of PMX-HP for 90-day mortality adjusted by SOFA score on the day of PMX-HP initiation.

|                                                                     | crude HR (95%CI) | <i>P</i> value | adjusted HR (95%CI) | <i>P</i> value |
|---------------------------------------------------------------------|------------------|----------------|---------------------|----------------|
| Time from ICU admission to administration of PMX-HP, early vs. late | 0.45 (0.17–1.19) | 0.11           | 0.54 (0.20–1.51)    | 0.24           |

We constructed a multivariate Cox proportional hazard model to evaluate the association between the timing of PMX-HP (early vs. late administration) and survival time at 90 days. In this post-hoc multivariate model, we used SOFA score on the day of PMX-HP initiation as an adjuster instead of APACHE II score on the day of ICU admission to adjust the severity on the day of PMX-HP initiation. Other adjusters were identical with primary analysis, which were age ( $\geq 65$  years old), chronic illness (Charlson comorbidity index  $\geq 3$ ), disability (performance status  $\geq 3$ ), source of infection (urinary tract/abdomen or not), emergent surgery (yes/no), serum lactate concentration ( $\geq 4$  mmol/L), vasoactive inotropic score ( $\geq 30$ ), and bacteremia (yes/no).

ICU: intensive care unit; HR: hazard ratio; CI: confidence interval; PMX-HP: polymyxin B hemoperfusion; SOFA: sequential organ failure assessment; APACHE: acute physiology and chronic health evaluation.



Supplementary Table 3. Hazard ratio of time from ICU admission to administration of PMX-HP as a continuous variable for 90-day mortality.

|                                                        | crude HR (95%CI) | <i>P</i> value | adjusted HR (95%CI) | <i>P</i> value |
|--------------------------------------------------------|------------------|----------------|---------------------|----------------|
| Time from ICU admission to administration of PMX-HP, h | 1.04 (0.99–1.08) | 0.071          | 1.05 (1.00–1.09)    | 0.057          |

We constructed univariate and multivariate Cox proportional hazard models to evaluate the association between the timing of PMX-HP as continuous variable (h) and survival time at 90 days. In the multivariate model, we used predefined adjusters selected based on previous literature and clinical judgement, which were age ( $\geq 65$  years old), chronic illness (Charlson comorbidity index  $\geq 3$ ), disability (performance status  $\geq 3$ ), illness severity (acute physiology and chronic health evaluation II score  $\geq 21$ ), source of infection (urinary tract/abdomen or not), emergent surgery (yes/no), serum lactate concentration ( $\geq 4$  mmol/L), vasoactive inotropic score ( $\geq 30$ ), and bacteremia (yes/no).

ICU: intensive care unit; HR: hazard ratio; CI: confidence interval; PMX-HP: polymyxin B hemoperfusion.
